# Supplementary material for: Five Species of Wild Freshwater Sport Fish in Wisconsin, USA, Reveal Highly Diverse Viromes
Source: MDPI journal article supplement (doi:10.3390/pathogens13020150), 2024-02-07
Supplement: s1 [file s1]

Table S1: Sampling locations for the five fish species sampled during the Wisconsin fish survey (*L. macrochirus*, *S. trutta*, *A. fulvescens*, *E. Lucius* and *S. vitreus*).

| Water body                 | Latitude | Longitude | Species  |      |         |       |          |
|----------------------------|----------|-----------|----------|------|---------|-------|----------|
| Ash Creek                  | 43.29906 | -90.43173 | -        | -    | -       | Trout | -        |
| Asylum Bay                 | 44.06165 | -88.51517 | Bluegill | Pike | -       | -     | -        |
| Besadny Anadromous         |          |           |          |      |         |       |          |
| Fisheries Area             | 44.46415 | -87.5595  | -        | -    | -       | Trout | -        |
| Bluff Creek                | 42.81745 | -88.69301 | -        | -    | -       | Trout | -        |
| Coon Valley                | 43.6844  | -91.04043 | -        | -    | -       | Trout | -        |
| Delevan Lake               | 42.60136 | -88.6152  | -        | -    | Walleye | -     | -        |
| Dutch Hollow Lake          | 43.60719 | -90.17929 | -        | Pike | Walleye | -     | -        |
| Eau Claire Lake            | 44.76203 | -91.10116 | Bluegill | Pike | Walleye | -     | -        |
| Elk Creek                  | 43.45217 | -90.65797 | -        | -    | -       | Trout | -        |
| Emmons Creek               | 44.30023 | -89.23842 | -        | -    | -       | Trout | -        |
| Fox River                  | 44.4635  | -88.05415 | -        | Pike | Walleye | -     | -        |
| Green Lake                 | 43.79711 | -89.02359 | -        | -    | Walleye | -     | -        |
| Lac Courte Oreilles        | 45.89023 | -91.43466 | Bluegill | Pike | Walleye | -     | -        |
| Lake Altoona               | 44.81691 | -91.44101 |          | Pike | Walleye | -     | -        |
| Lake Kegonsa               | 42.97985 | -89.23332 | Bluegill | Pike | -       | -     | -        |
| Lake Poygan                | 44.17544 | -88.78686 |          | Pike | -       | -     | -        |
| Lake Sherwood              | 44.20257 | -89.80482 | Bluegill | Pike | -       | -     | -        |
| Lake Winnebago             | 44.10607 | -88.47873 | Bluegill | Pike | -       | -     | -        |
| Lake Wisconsin             | 43.37236 | -89.55848 | Bluegill | -    | -       | -     | -        |
| Lipsett Lake               | 45.87378 | -92.04847 | -        | Pike | -       | -     | -        |
| Little La Crosse River     | 43.85934 | -90.8209  | -        | -    | -       | Trout | -        |
| Little Saint Germaine Lake | 45.92572 | -89.4419  | Bluegill | Pike | -       | -     | -        |
| Long Lake                  | 45.68567 | -91.7106  | -        | Pike | Walleye | -     | -        |
| Madeline Lake              | 45.89    | -89.64762 | Bluegill | Pike | Walleye | -     | -        |
| Middle Eau Claire Lake     | 46.30306 | -91.51782 | Bluegill | Pike | Walleye | -     | -        |
| Milwaukee Harbour          | 43.01753 | -87.90257 | -        | -    | -       | Trout | -        |
| Mississippi River          | 43.09781 | -91.1536  | Bluegill | -    | Walleye | -     | -        |
| Mormon Coulee              | 43.76548 | -91.14373 | -        | -    | -       | Trout | -        |
| Neenah Creek               | 43.7922  | -89.61494 | -        | -    | -       | Trout | -        |
| Nepco Lake                 | 44.34373 | -88.80911 | Bluegill | Pike | -       | -     | -        |
| Otter Creek                | 43.58098 | -90.66241 | -        | -    | -       | Trout | -        |
| Pelican Lake               | 45.50724 | -89.21044 | Bluegill | Pike | Walleye | -     | -        |
| Petenwell Lake             | 44.18712 | -89.91348 | -        | Pike | Walleye | -     | -        |
| Plum Creek                 | 43.135   | -90.9445  | -        | -    | -       | Trout | -        |
| Red River                  | 45.05089 | -89.01189 | -        | -    | -       | Trout | -        |
| Rock Lake                  | 43.08568 | -88.92951 | Bluegill | Pike | Walleye | -     | -        |
| Rush Creek                 | 43.39904 | -91.09828 | -        | -    | -       | Trout | -        |
| Shawano Dam                | 44.8358  | -88.62334 | -        | -    | -       | -     | Sturgeon |
| Spring Coulee              | 43.69013 | -90.93577 | -        | -    | -       | Trout | -        |
| Tainter Creek              | 43.4132  | -90.8926  | -        | -    | -       | Trout | -        |
| Tomorrow River             | 44.4581  | -89.30292 | -        | -    | -       | Trout | -        |
| Turtle FlambeauFlowage     | 46.09615 | -90.24521 | -        | Pike | Walleye | -     | -        |
| White Lake                 | 45.16297 | -88.76961 | Bluegill | Pike | -       | -     | -        |
| Yellow River               | 45.82126 | -91.88982 | -        | Pike | -       | -     | -        |

Table S2: Environmentally-derived viral contigs present in samples from the five fish species examined in this study (*L. macrochirus*, *S. trutta*, *A. fulvescens*, *E. Lucius* and *S. vitreus*).

| Host          | Name                | Length | Closest match (source, location, year, accession)*                                            | E-Value*  | % ID (NR)* |
|---------------|---------------------|--------|-----------------------------------------------------------------------------------------------|-----------|------------|
| bluegill      | Eaclepmac virus 1   | 695    | Horse nettle virus A (plant, USA, 2021, WEY36561.1)                                           | 6.00E-92  | 69.7       |
|               | Asylepmac virus 1   | 511    | Grapevine chrome mosaic virus (NP_619704.1)                                                   | 4.00E-27  | 41.88      |
|               | Eclepmac virus 1    | 413    | Grapevine chrome mosaic virus (NP_619705.1)                                                   | 7.00E-55  | 64.75      |
|               | Eclepmac virus 2    | 632    | Grapvine chrome mosaic virus (YP_002000610.1)                                                 | 1.00E-93  | 63.81      |
| lake sturgeon | Swdaciful virus 1   | 560    | Otus toti-like virus (algae, DAZ87248.1)                                                      | 8.00E-40  | 50         |
|               | Swdaciful virus 2   | 722    | Red algae totivirus 1 (Japan, 2016, BBZ90082.1)                                               | 3.00E-59  | 50.87      |
|               | Swdaciful virus 3   | 370    | Picornavirales sp. (enviroment, China, ULF99736.1)                                            | 2.00E-75  | 100        |
|               | Clinch densovirus 1 | 1342   | Clinch densovirus 1 (mussel, USA, 2018, QNL09579.1)                                           | 5.00E-136 | 100        |
|               | Swdaciful virus 4   | 360    | Clinch densovirus 1 (mussel, USA, 2018, YP_010802875)                                         | 3.00E-78  | 100        |
|               | Swdaciful virus 5   | 661    | Sanxia water strider virus 8 (insect, China, 2013, YP_009337665.1)                            | 2.00E-23  | 39.2       |
|               | Swdaciful virus 7   | 734    | Dragonfly larvae associated circular virus-10 (insect, New Zealand, 2013, ALF29826.1)         | 3.00E-33  | 56.64      |
| northern pike | Whiesoluc virus 1   | 8206   | Novo Mesto dicistrovirus 2 (Plant, Slovenia, UTQ50718.1)                                      | 0         | 99.1       |
|               | Whiesoluc virus 2   | 3058   | Novo Mesto dicistrovirus 2 (Plant, Slovenia, UTQ50718.1)                                      | 0         | 87.4       |
|               | Whiesoluc virus 3   | 1110   | Dicistroviridae sp. (plant, China, ULF99799.1)                                                | 0         | 95.66      |
|               | Asyesoluc virus 1   | 545    | Botourmiaviridae sp. (Fungus, Spain, 2018, UYL94570.1)                                        | 9.00E-121 | 95.58      |
|               | Whiesoluc virus 4   | 863    | Plasmopara viticola lesion associated dicistro-like virus 1 (fungus, Italy, 2018, QHD64742.1) | 2.00E-104 | 57.24      |
| walleye       | Gresanvit virus 1   | 304    | Purpureocillium lilacinum nonsegmented virus 1 (fungus, 2016, AOO52900.1)                     | 7.00E-23  | 99         |

<sup>a</sup> As described by the ICTV and/or ViralZone.expasy.org

<sup>b</sup> Closest match, E-value and % identity (amino acid) were identified by querying viral contig sequences against NCBI's non-redundant protein database using tblastx

Table S3: ORFs and substitution models used for each Bayesian phylogenetic tree

| Species                                   | Tree                    | ORF                                                            | ORF completedness | Substitution model |
|-------------------------------------------|-------------------------|----------------------------------------------------------------|-------------------|--------------------|
| Bluegill<br>( <i>L. macrochirus</i> )     | <i>Matonaviridae</i>    | Non-structural protein containing RNA dependent RNA polymerase | Partial           | GTR+G4             |
|                                           | <i>Revtraviricetes</i>  | RNA dependent RNA polymerase                                   | Complete          | GTR+I+G4           |
| Brown trout<br>( <i>S. trutta</i> )       | <i>Spinareoviridae</i>  | mu2                                                            | Partial           | GTR+I+G4           |
| Lake sturgeon<br>( <i>A. fulvescens</i> ) | <i>Circoviridae</i>     | Replication-associated protein                                 | Partial           | SYM+I+G4           |
|                                           | <i>Hepadnaviridae</i>   | DNA polymerase                                                 | Partial           | GTR+I+G4           |
|                                           | <i>Picornaviridae</i>   | RNA dependent RNA polymerase                                   | Partial           | GTR+G4             |
| Northern pike<br>( <i>E. lucius</i> )     | <i>Amnoonviridae</i>    | RNA dependent RNA polymerase                                   | Partial           | GTR+I+G4           |
|                                           | <i>Narnaviridae</i>     | RNA dependent RNA polymerase                                   | Partial           | GTR+I+G4           |
|                                           | <i>Picobirnaviridae</i> | RNA dependent RNA polymerase                                   | Partial           | GTR+G4             |
| Walleye<br>( <i>S. vitres</i> )           | <i>Peribunyaviridae</i> | RNA dependent RNA polymerase                                   | Partial           | GTR+I+G4           |
|                                           | <i>Picornaviridae</i>   | Polyprotein containing RNA dependent RNA polymerase            | Partial           | GTR+I+G4           |
|                                           | <i>Gammacoronavirus</i> | Nucleocapsid                                                   | Complete          | GTR+I+G4           |

Table S4: Virus prevalence in each fish species (*L. macrochirus*, *S.trutta*, *A. fulvescens*, *E. Lucius* and *S. vitreus*).

| Virus                   | bluegill | brown trout | lake sturgeon | northern pike | walleye |
|-------------------------|----------|-------------|---------------|---------------|---------|
| Eaulepmac virus 1       | 28.57    | -           | -             | -             | -       |
| Mislepmac virus 1       | 7.14     | -           | -             | -             | -       |
| Litlepmac virus 1       | 7.14     | -           | -             | -             | -       |
| Piscine orthoreovirus 3 | -        | 5.56        | -             | -             | -       |
| Shdaciful virus 1       | -        | -           | 38.71         | -             | -       |
| Shdaciful virus 2       | -        | -           | 83.87         | -             | -       |
| Shdaciful virus 3       | -        | -           | 64.51         | -             | -       |
| Shdaciful virus 4       | -        | -           | 80.65         | -             | -       |
| Shwaciful virus 1       | -        | -           | 16.13         | -             | -       |
| Swdaciful virus 8       | -        | -           | 25.81         | -             | -       |
| Lipesoluc virus 1       | -        | -           | -             | 4.35          | -       |
| Petesoluc virus 1       | -        | -           | -             | 21.74         | -       |
| Whiesoluc virus 5       | -        | -           | -             | 8.7           | -       |
| Whiesoluc virus 6       | -        | -           | -             | 8.7           | -       |
| Whiesoluc virus 7       | -        | -           | -             | 8.7           | -       |
| Petesoluc virus 2       | -        | -           | -             | 8.7           | -       |
| Pelsanvit virus 1       | -        | -           | -             | -             | 5.88    |
| Plasanvit virus 1       | -        | -           | -             | -             | 11.76   |
| Tursanvit virus 1       | -        | -           | -             | -             | 64.71   |
